# Supplementary material
Source: PubMed Central journal article supplement (PMC5214513)

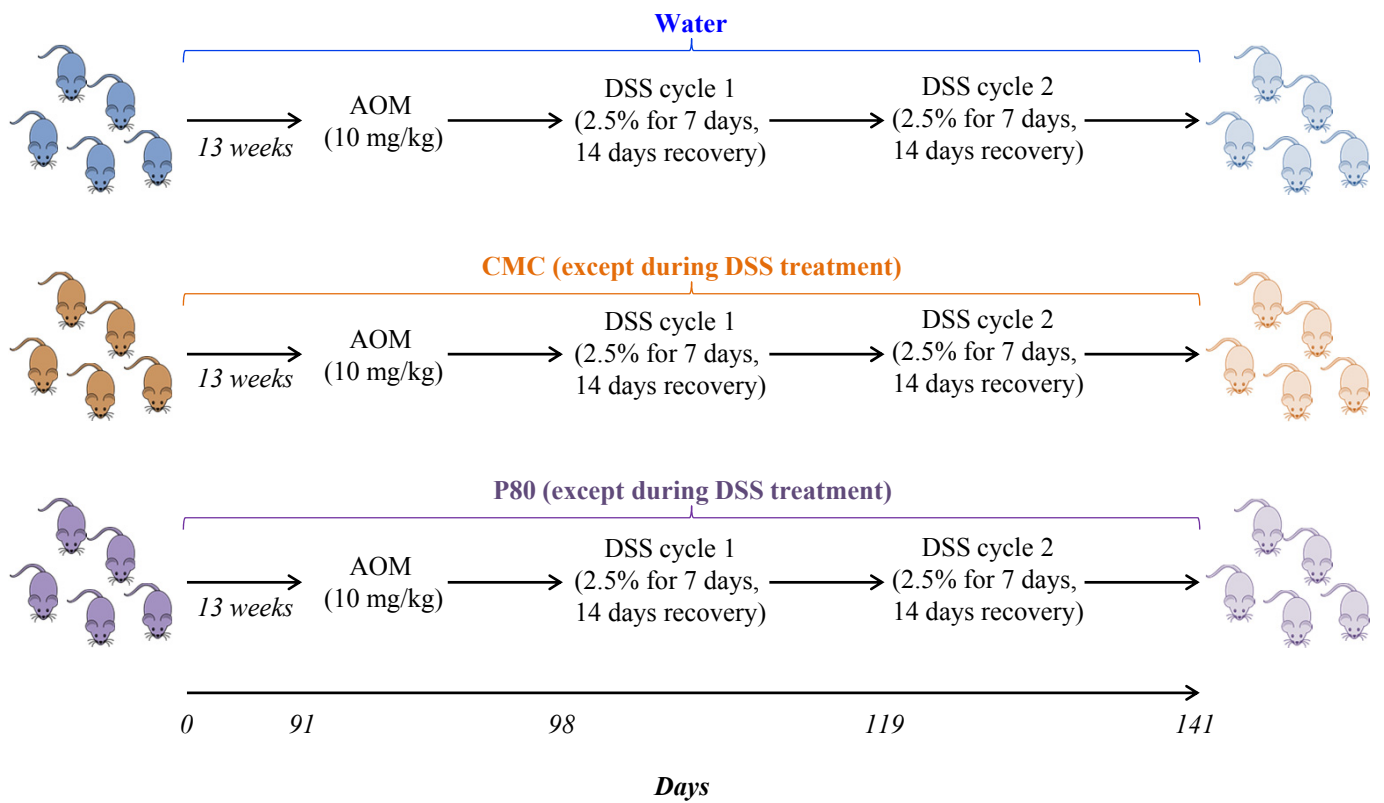

**Figure S1.**

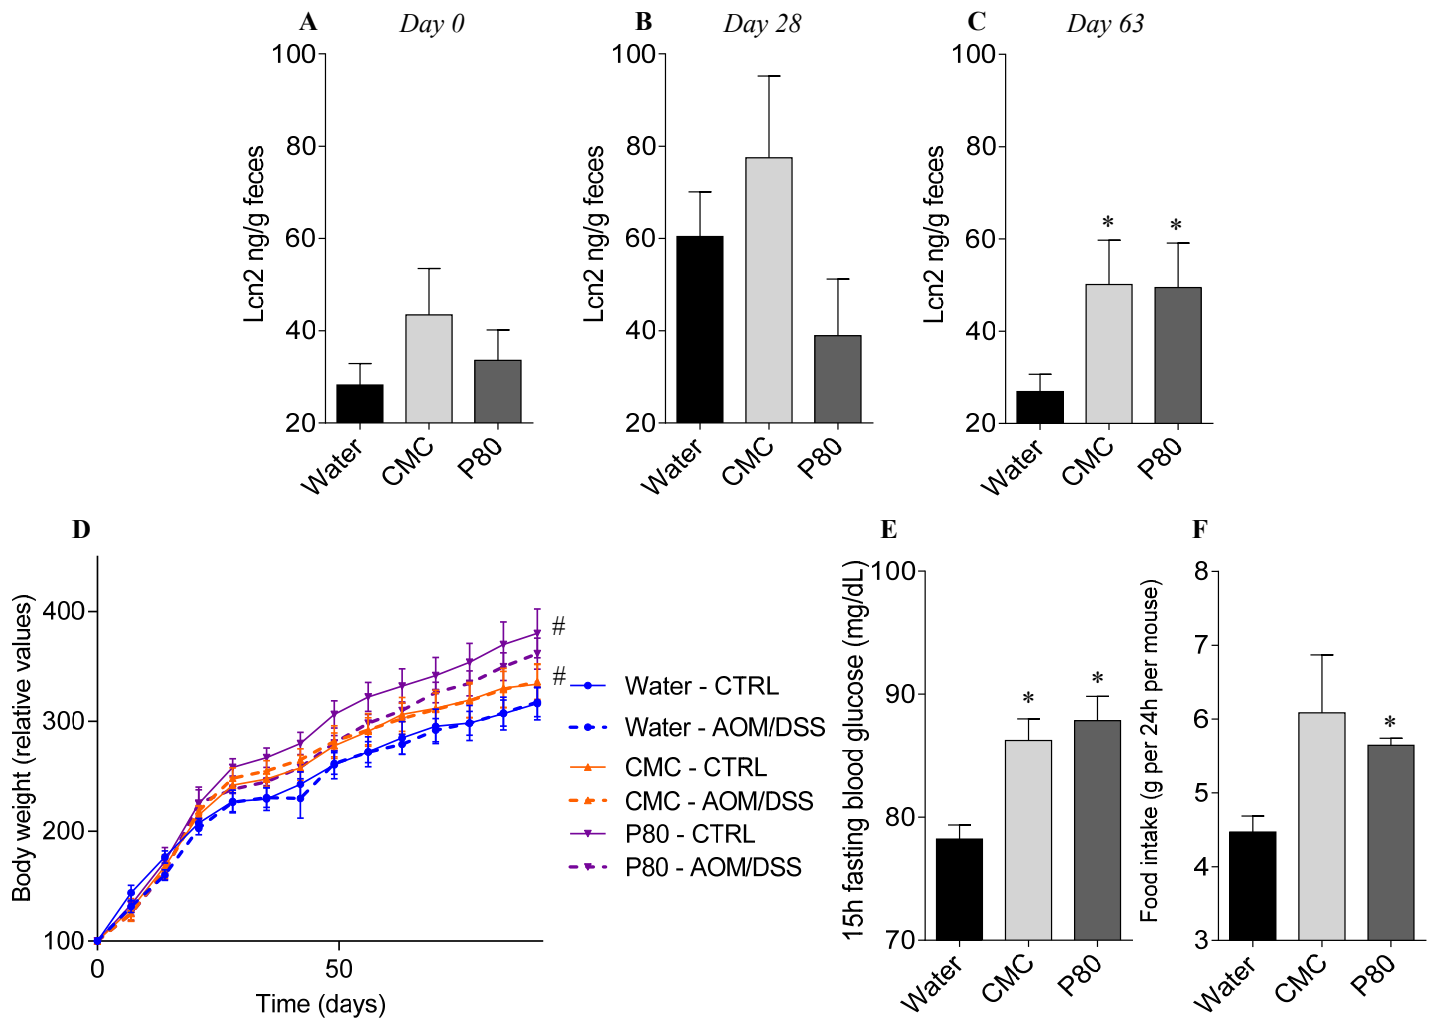

**Figure S2.**

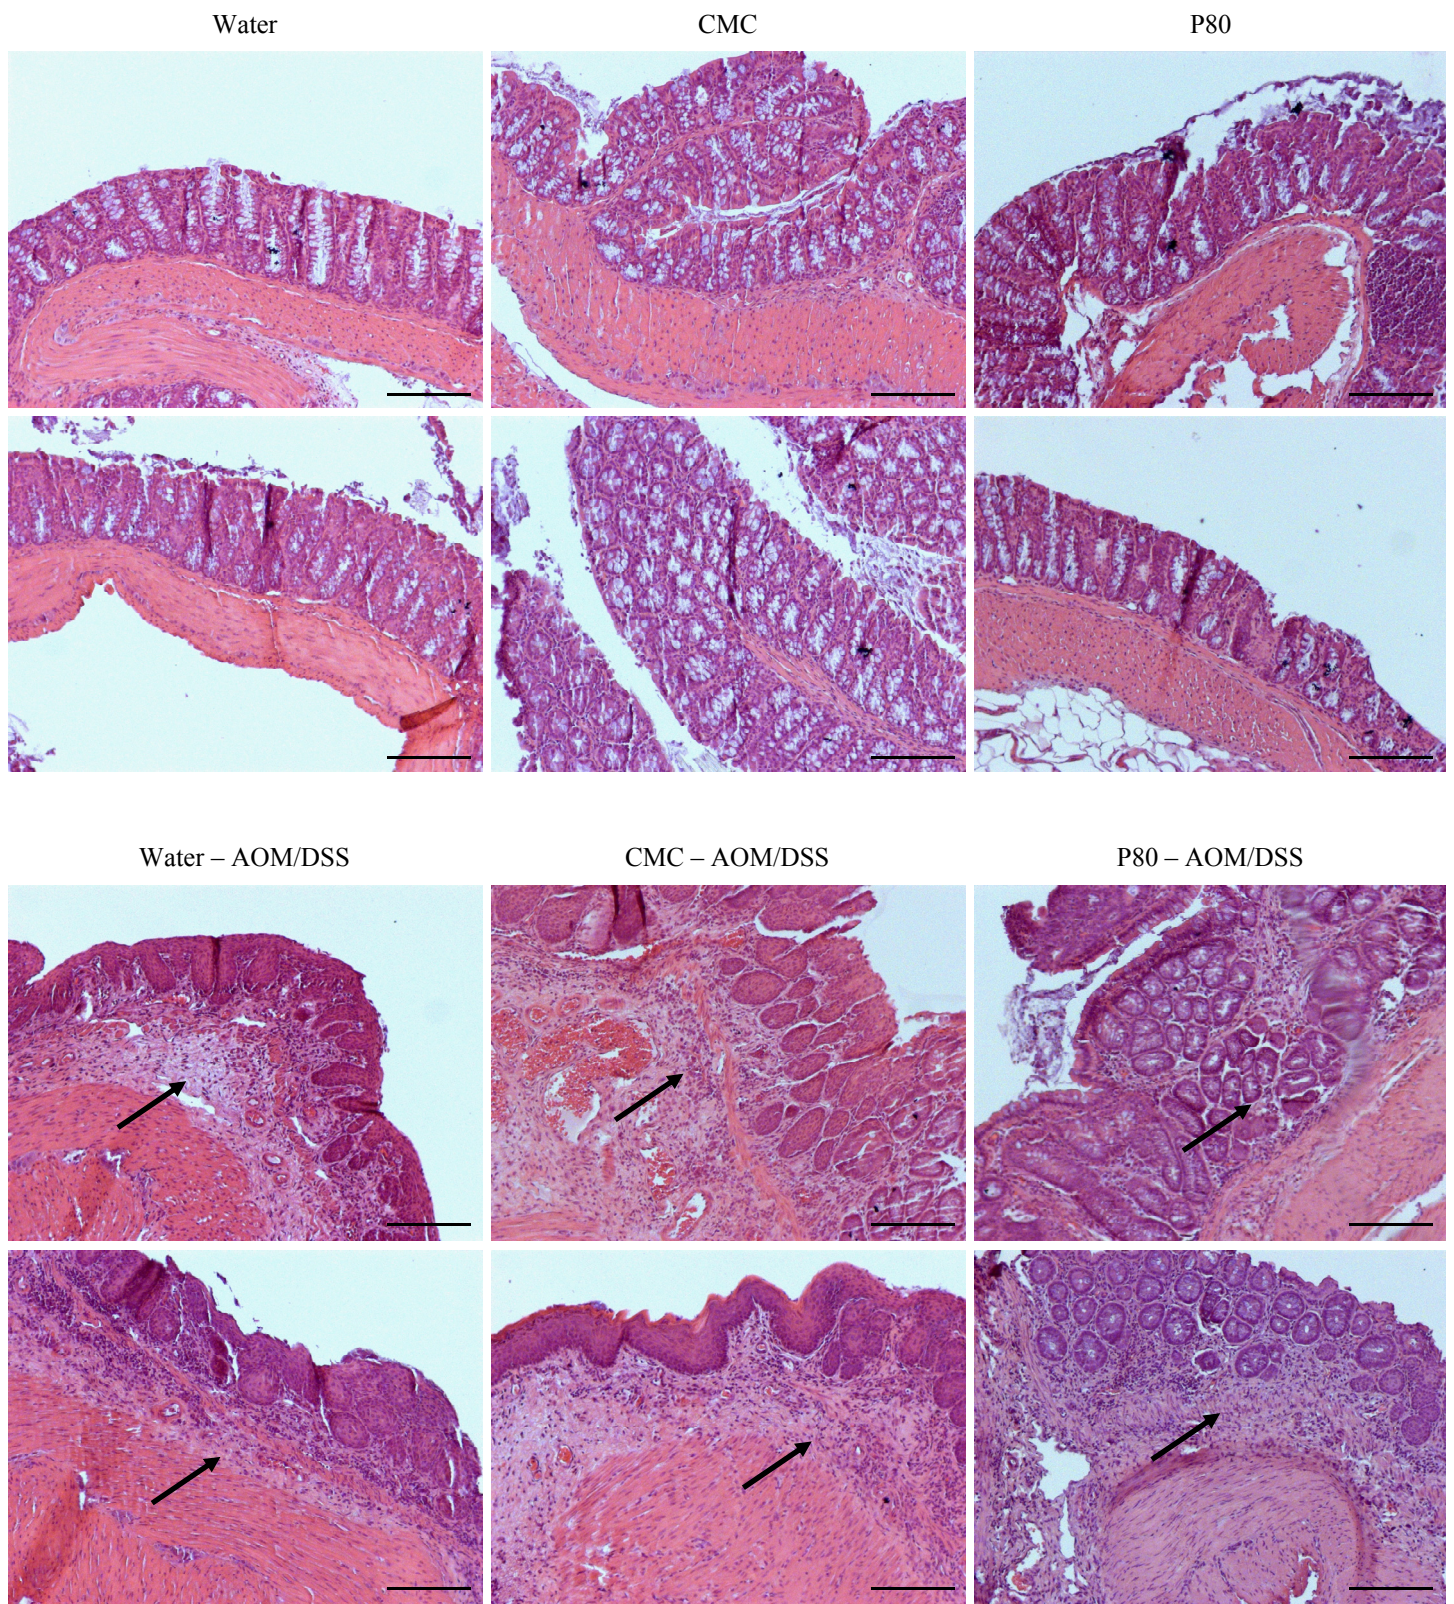

**Figure S3.**

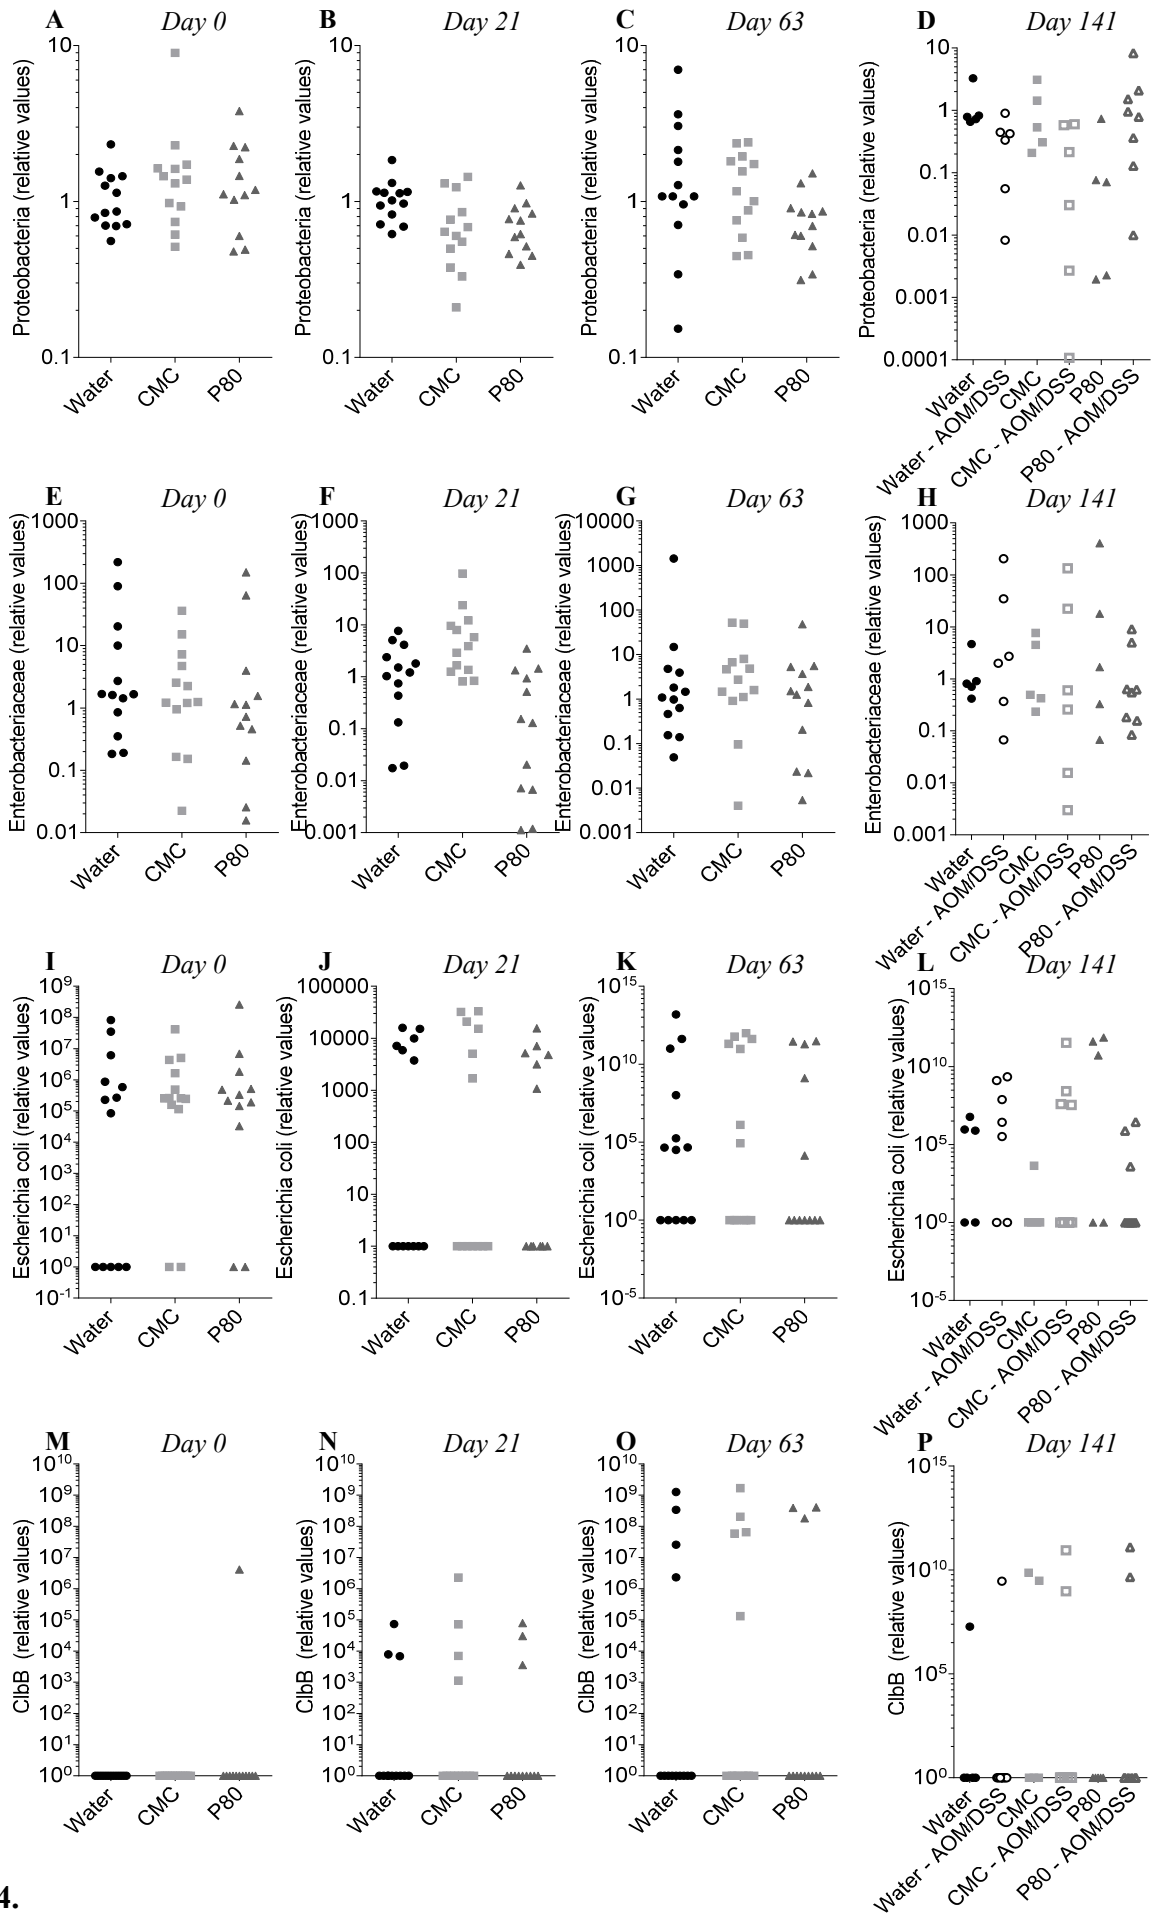

Figure S4.

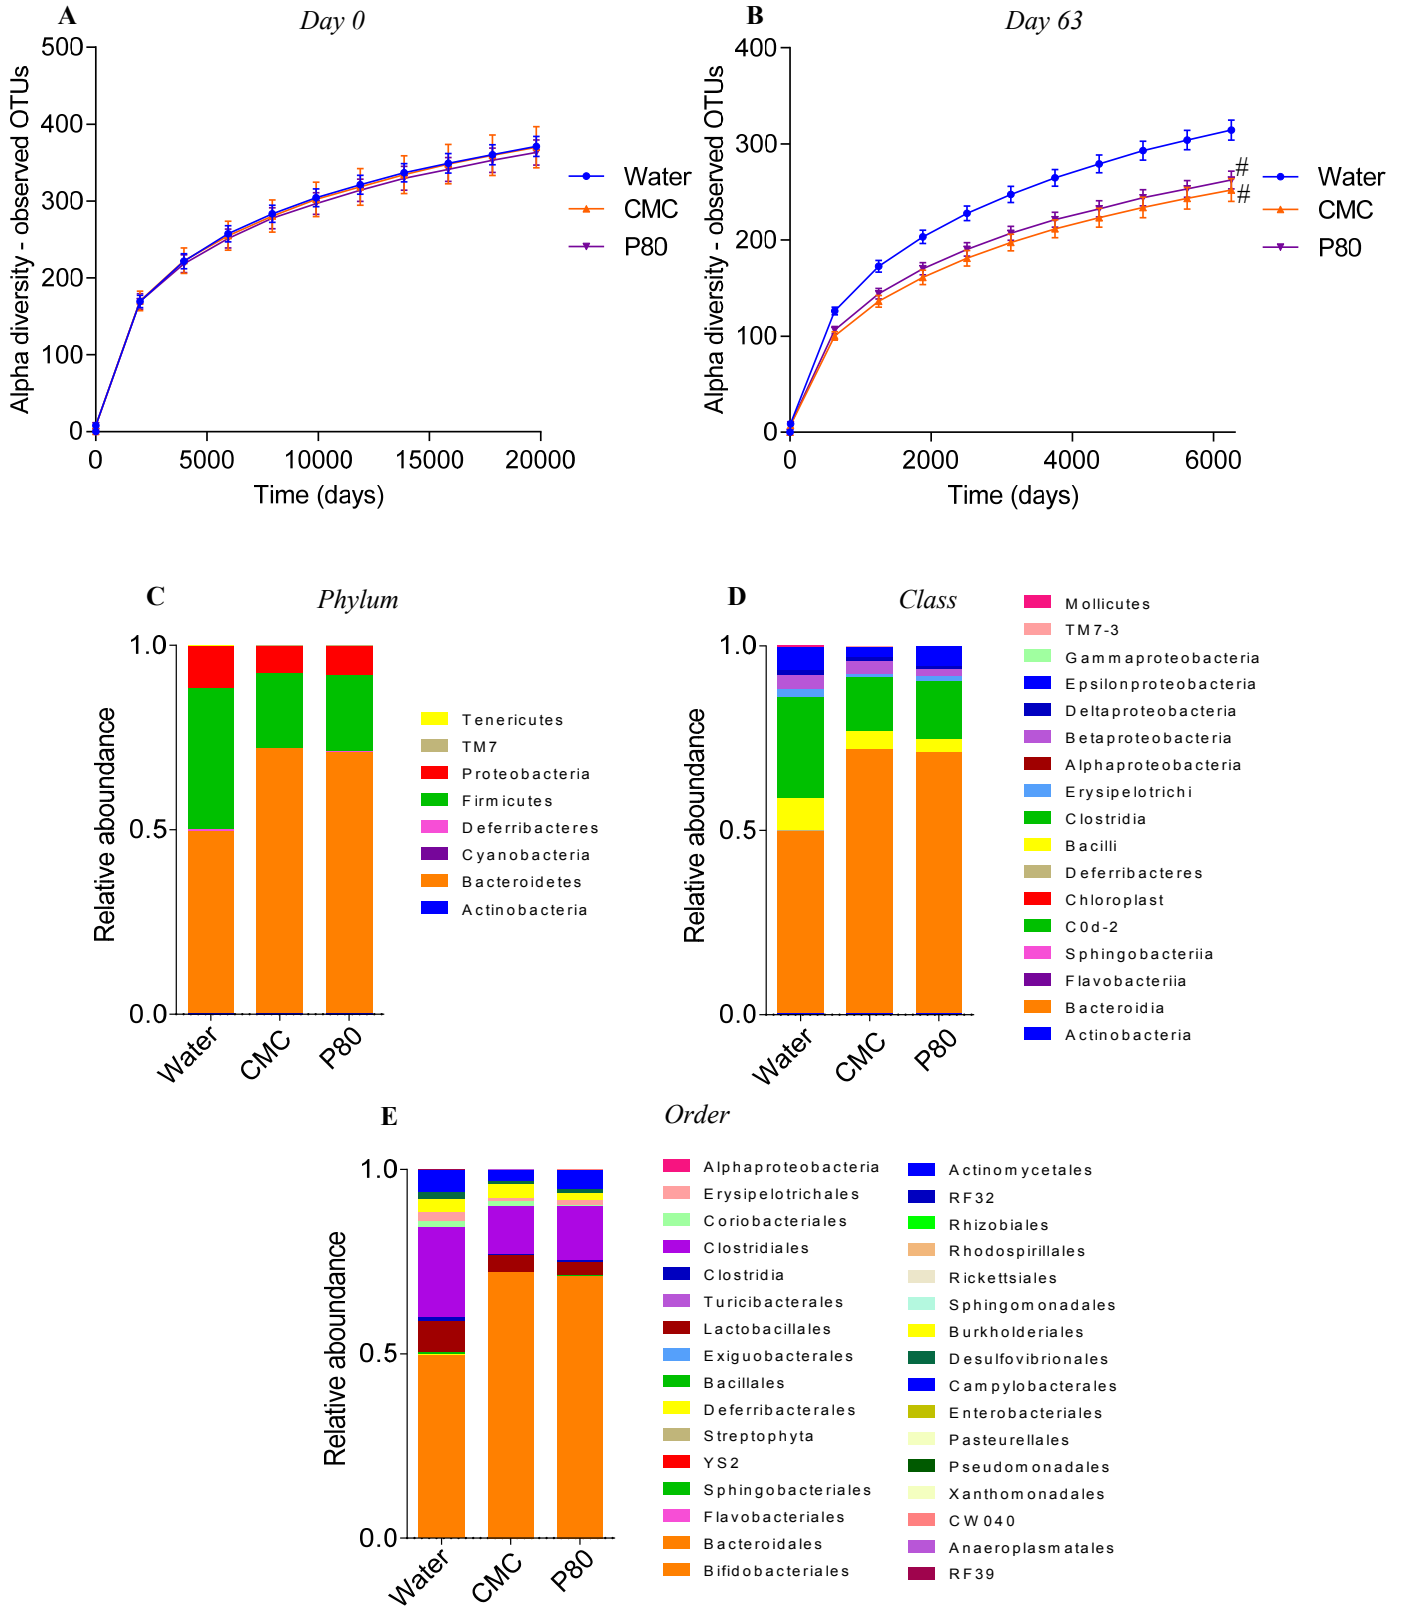

Figure S5.

**A**

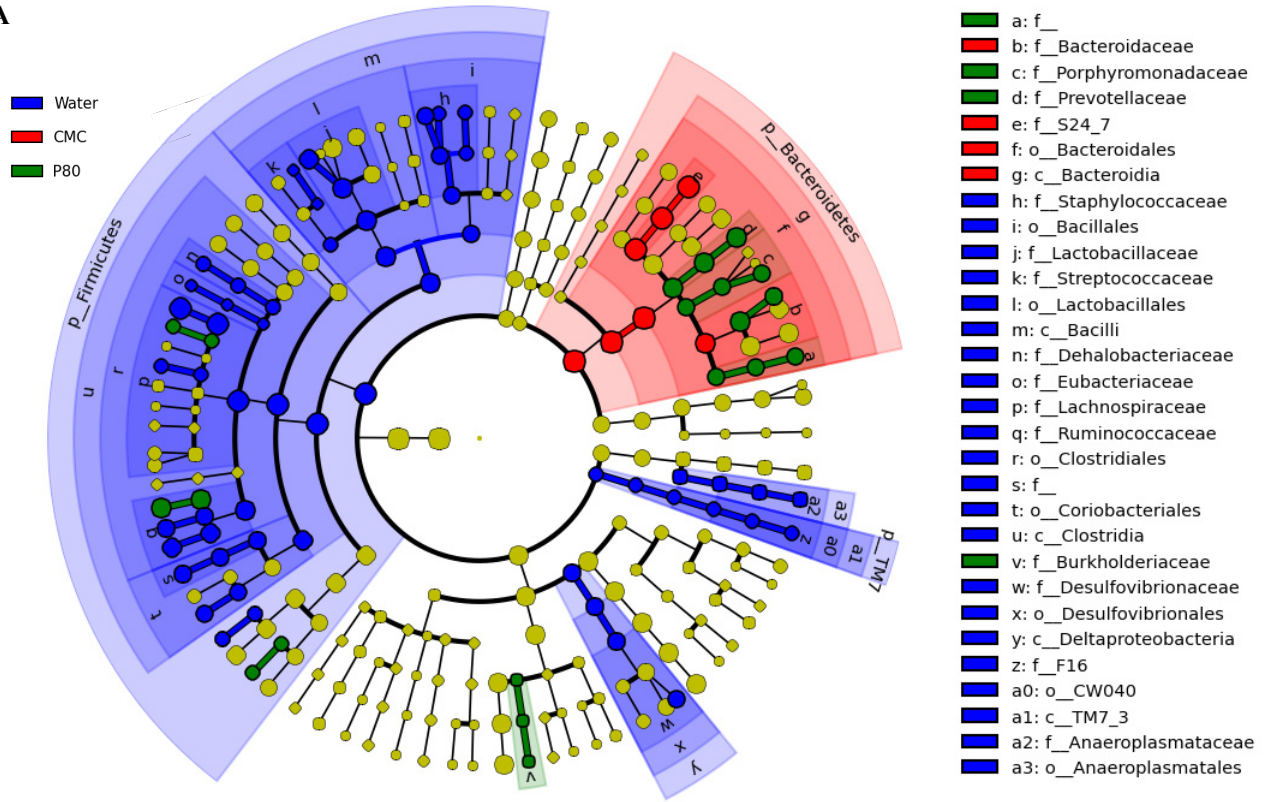

**B**

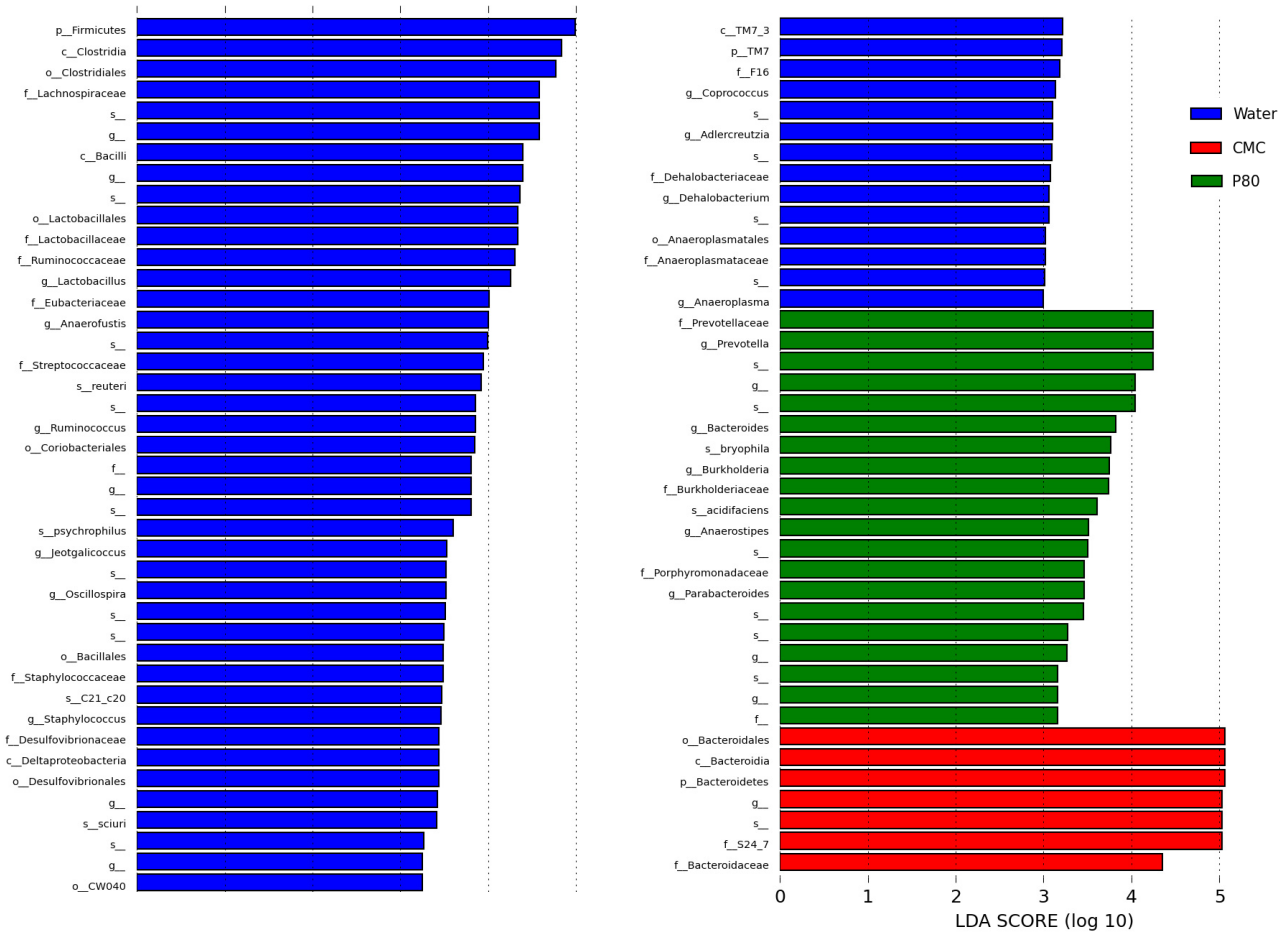

**Figure S6.**

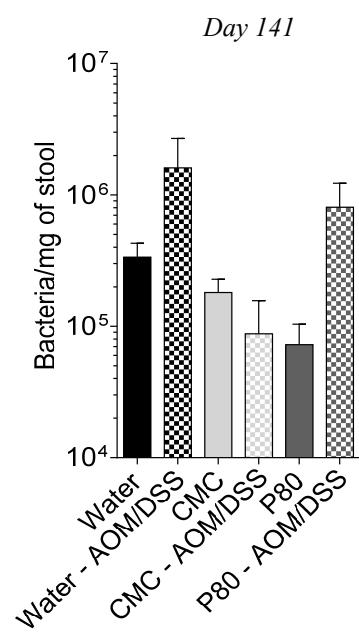

**Figure S7.**

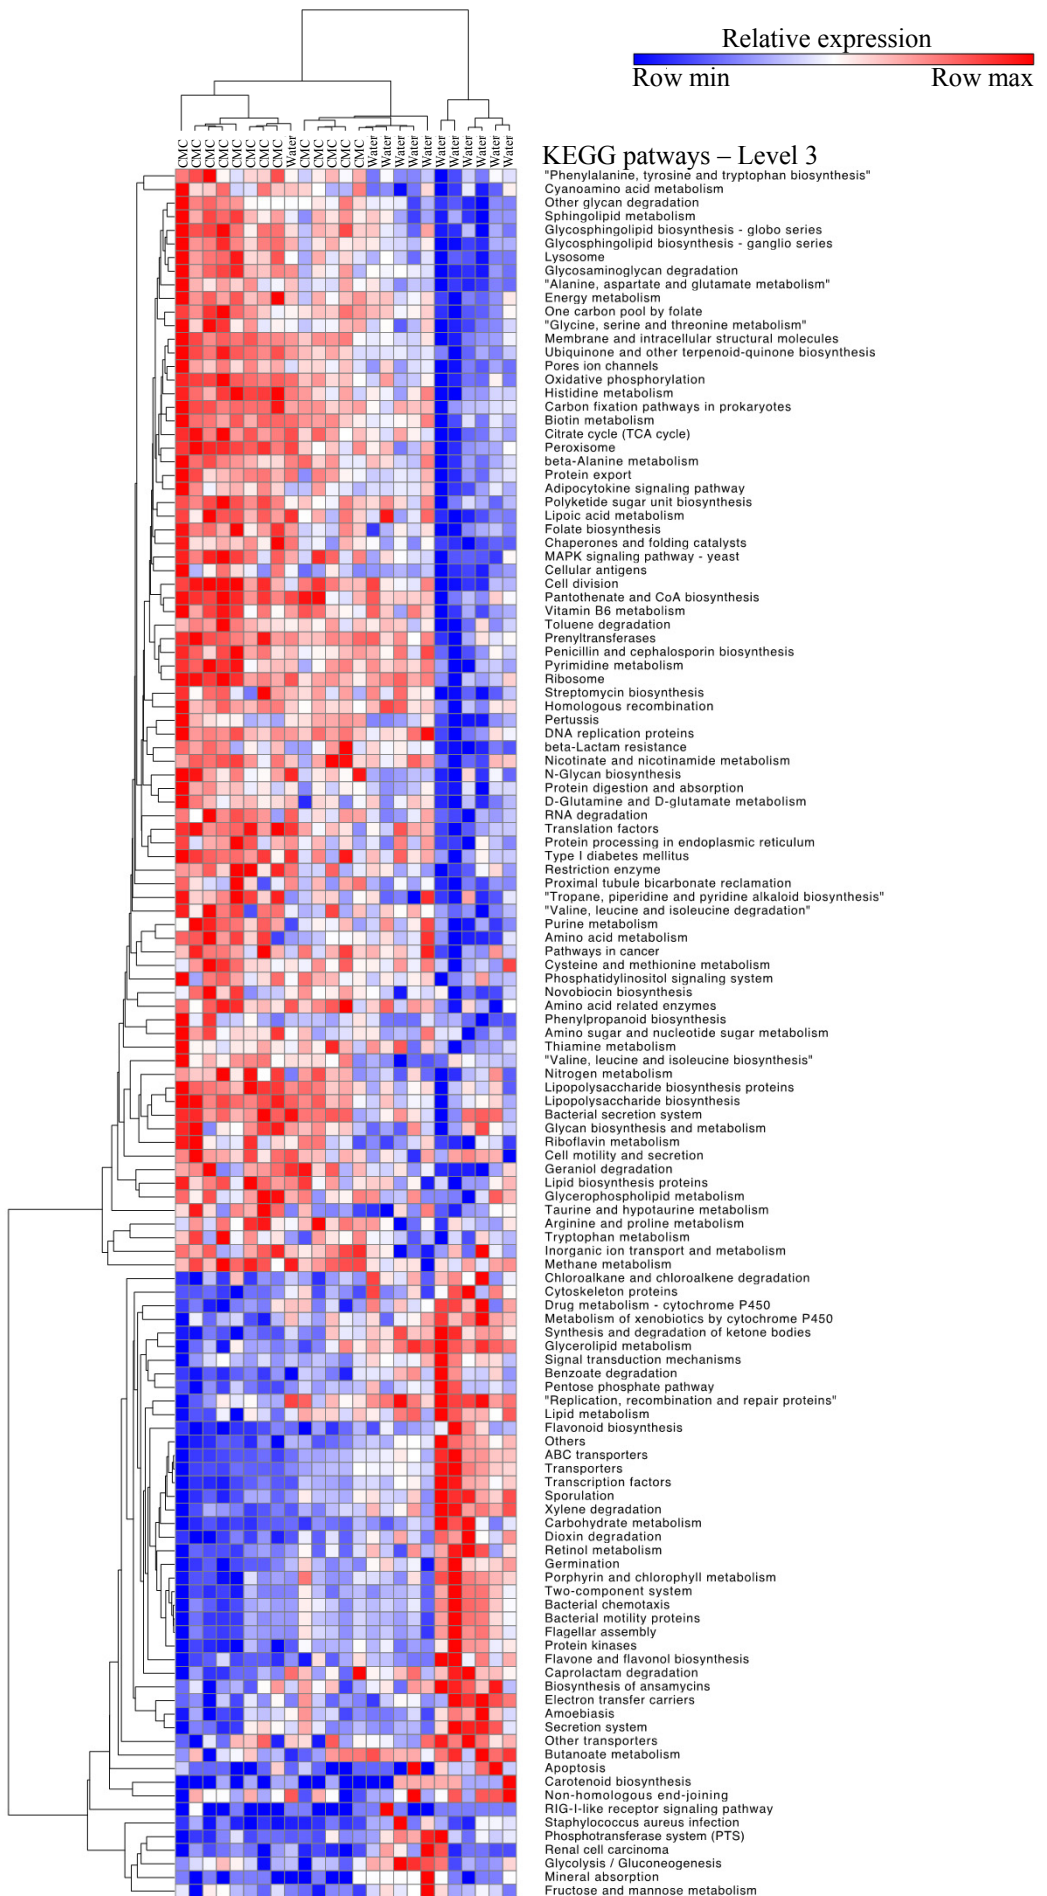

Figure S8.



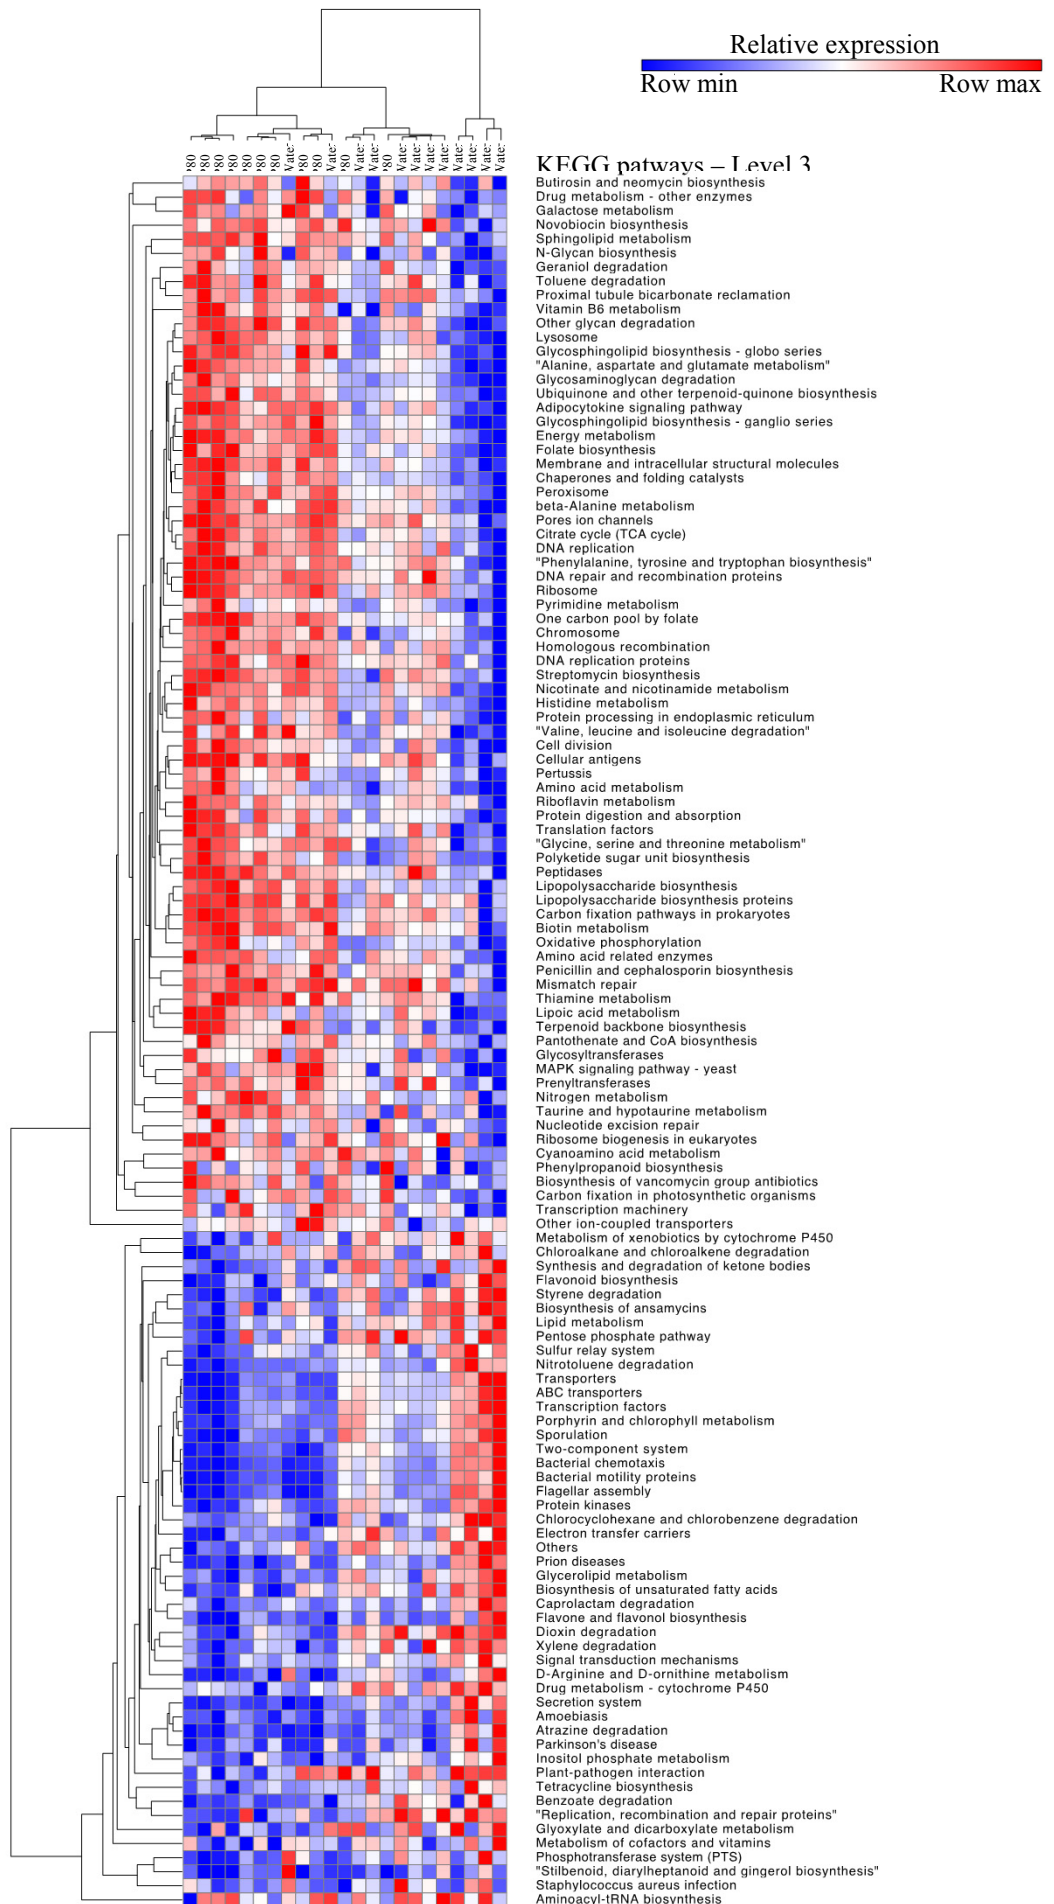

**Figure S9.**

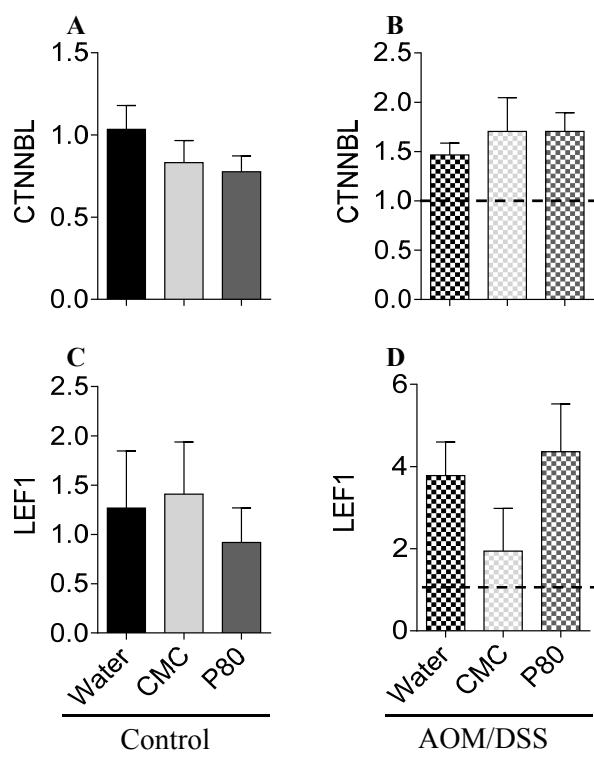

Figure S10.

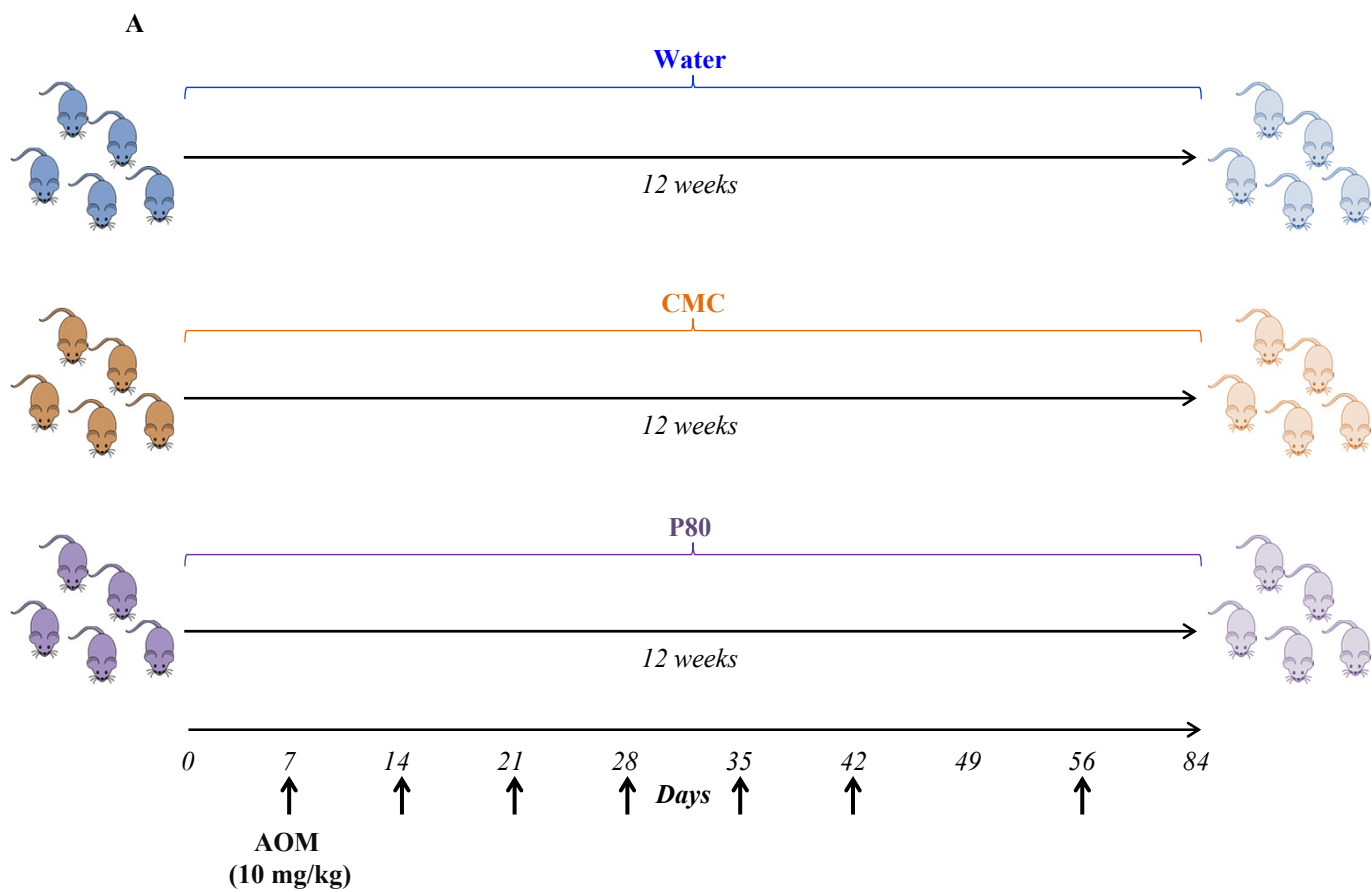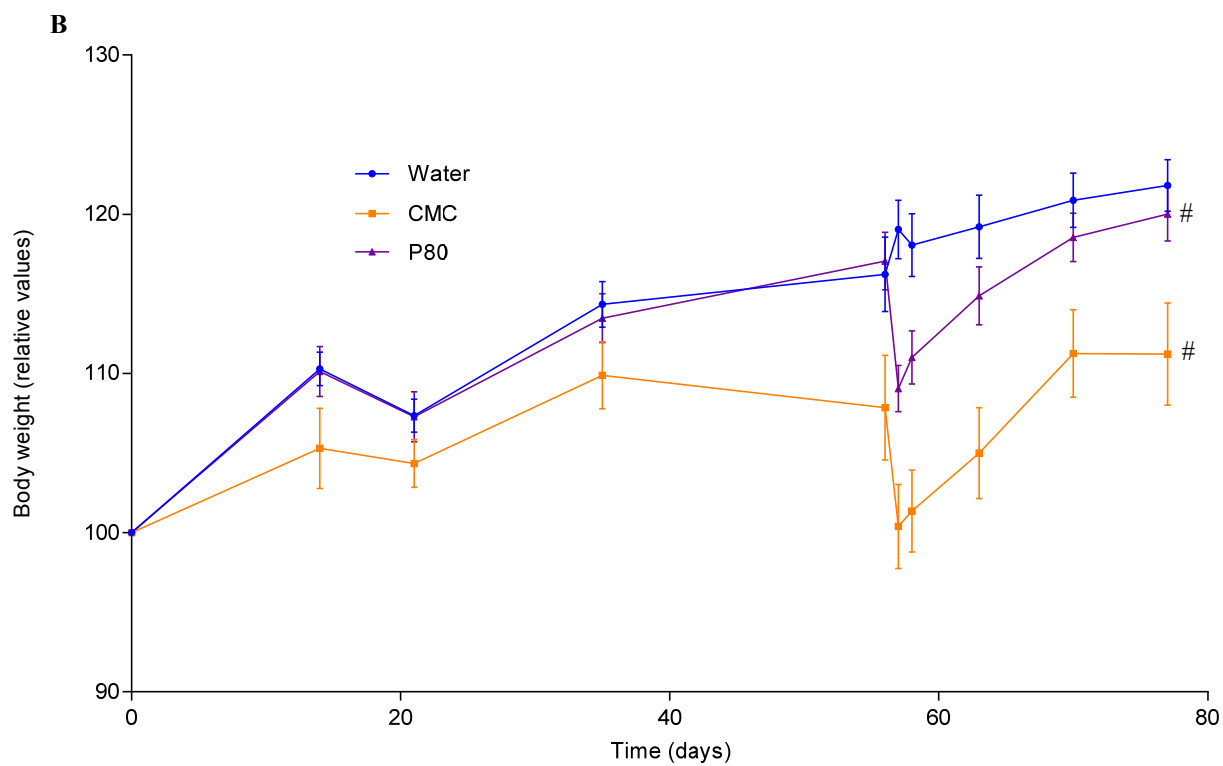

**Figure S11.**

Supplement: NIHMS828197-supplement-4.pdf [file NIHMS828197-supplement-4.pdf]
